# Supplementary figures and images for: α-Synuclein Overexpression Increases Dopamine D2/3 Receptor Binding and Immune Activation in a Model of Early Parkinson’s Disease
Source: MDPI journal article supplement (doi:10.3390/biomedicines9121876), 2021-12-10

## Supplementary Figure

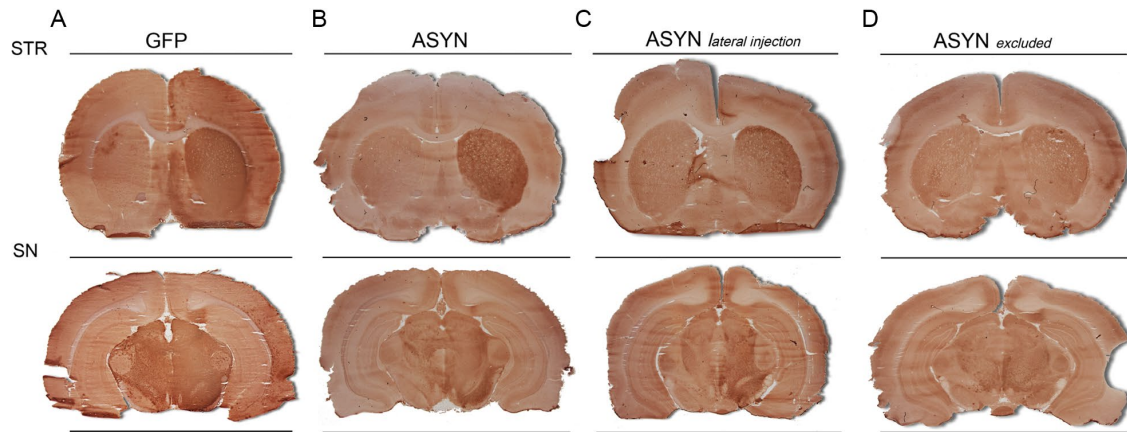

Supplement: s1 [file s1]
